# Supplementary material for: Anatomically and functionally distinct thalamocortical inputs to primary and secondary mouse whisker somatosensory cortices
Source: PubMed Central journal article supplement (PMC7335197; doi:10.1038/s41467-020-17087-7), 2020-07-03
Supplement: 41467_2020_17087_MOESM4_ESM.pdf [file 41467_2020_17087_MOESM4_ESM.pdf]

### **Description of Additional Supplementary Files**

File Name: Supplementary Movie 1

Description: Serial two-photon scanning of a perfused brain expressing tdTomato in POM first-order neurons and eYFP in POM higher-order. The movie goes back and forth along the rostro-caudal axis to highlight the location of the two nuclei.

File Name: Supplementary Movie 2

Description: Two-photon z-stack imaging of VPM first-order axons in wS2 seen through a microprism in an awake mouse.
